# Supplementary material
Source: Copernicus journal article supplement (doi:10.5194/egusphere-2026-1709)
Supplement: Supplementary file 1 [file egusphere-2026-1709-supplement.pdf]

**Supplement to:**

**ORACLE-lite (v3.0): a reduced-complexity module for simulating organic aerosol formation and evolution in long-term chemistry–climate models**

Alexandra P. Tsimpidi and Vlassis A. Karydis

Institute of Climate and Energy Systems: Troposphere (ICE-3), Forschungszentrum Jülich GmbH, Jülich, Germany

**Table S1:** Statistical evaluation of EMAC-simulated PM<sub>1</sub> SOA-sv concentrations against AMS and ACSM observations of L-OOA over 2000–2020. Results are shown for Europe, North America, and Eastern Asia. These regions are further divided into rural, downwind, and urban sites.

| Continent     | Region   | Number of datasets | Mean observed ( $\mu\text{g m}^{-3}$ ) | Mean predicted ( $\mu\text{g m}^{-3}$ ) | MAGE ( $\mu\text{g m}^{-3}$ ) | MB ( $\mu\text{g m}^{-3}$ ) | NME (%) | NMB (%) | RMSE ( $\mu\text{g m}^{-3}$ ) |
|---------------|----------|--------------------|----------------------------------------|-----------------------------------------|-------------------------------|-----------------------------|---------|---------|-------------------------------|
| Europe        | all      | 82                 | 1.18                                   | 1.08                                    | 0.63                          | -0.10                       | 53.54   | -8.63   | 0.82                          |
|               | rural    | 58                 | 1.02                                   | 1.04                                    | 0.61                          | 0.02                        | 60.11   | 2.24    | 0.82                          |
|               | downwind | 13                 | 1.49                                   | 0.93                                    | 0.81                          | -0.56                       | 54.14   | -37.54  | 0.95                          |
|               | urban    | 11                 | 1.65                                   | 1.43                                    | 0.52                          | -0.22                       | 31.44   | -13.11  | 0.68                          |
| North America | all      | 51                 | 1.89                                   | 2.19                                    | 1.22                          | 0.30                        | 64.80   | 15.79   | 1.69                          |
|               | rural    | 28                 | 1.59                                   | 1.94                                    | 0.96                          | 0.34                        | 60.36   | 21.62   | 1.27                          |
|               | downwind | 3                  | 4.33                                   | 1.98                                    | 2.47                          | -2.35                       | 57.14   | -54.34  | 2.96                          |
|               | urban    | 20                 | 1.93                                   | 2.56                                    | 1.40                          | 0.63                        | 72.50   | 32.62   | 1.93                          |
| Eastern Asia  | all      | 100                | 4.69                                   | 2.68                                    | 2.39                          | -2.01                       | 50.91   | -42.91  | 3.35                          |
|               | rural    | 22                 | 4.03                                   | 2.23                                    | 2.20                          | -1.80                       | 54.69   | -44.61  | 2.76                          |
|               | downwind | 11                 | 3.84                                   | 2.77                                    | 1.20                          | -1.08                       | 31.19   | -28.07  | 1.61                          |
|               | urban    | 67                 | 5.05                                   | 2.81                                    | 2.65                          | -2.24                       | 52.39   | -44.32  | 3.72                          |

**Table S2:** Statistical evaluation of EMAC-simulated PM<sub>1</sub> SOA-iv concentrations against AMS and ACSM M-OOA observations over 2000–2020. Results are shown for Europe, North America, and Eastern Asia. These regions are further divided into rural, downwind, and urban sites.

| Continent     | Region   | Number of datasets | Mean observed ( $\mu\text{g m}^{-3}$ ) | Mean predicted ( $\mu\text{g m}^{-3}$ ) | MAGE ( $\mu\text{g m}^{-3}$ ) | MB ( $\mu\text{g m}^{-3}$ ) | NME (%) | NMB (%) | RMSE ( $\mu\text{g m}^{-3}$ ) |
|---------------|----------|--------------------|----------------------------------------|-----------------------------------------|-------------------------------|-----------------------------|---------|---------|-------------------------------|
| Europe        | all      | 92                 | 1.61                                   | 0.70                                    | 1.04                          | -0.91                       | 64.31   | -56.57  | 1.45                          |
|               | rural    | 66                 | 1.53                                   | 0.67                                    | 0.98                          | -0.86                       | 63.54   | -56.24  | 1.48                          |
|               | downwind | 14                 | 1.84                                   | 0.59                                    | 1.42                          | -1.25                       | 77.11   | -68.15  | 1.54                          |
|               | urban    | 12                 | 1.78                                   | 0.99                                    | 0.93                          | -0.78                       | 52.54   | -44.13  | 1.13                          |
| North America | all      | 60                 | 2.13                                   | 1.61                                    | 1.21                          | -0.52                       | 57.04   | -24.32  | 1.48                          |
|               | rural    | 33                 | 1.90                                   | 1.44                                    | 1.12                          | -0.46                       | 58.77   | -24.04  | 1.36                          |
|               | downwind | 4                  | 2.21                                   | 1.58                                    | 0.67                          | -0.64                       | 30.34   | -28.74  | 0.88                          |
| Eastern Asia  | urban    | 23                 | 2.44                                   | 1.85                                    | 1.45                          | -0.58                       | 59.33   | -23.93  | 1.70                          |
|               | all      | 109                | 6.42                                   | 0.96                                    | 5.46                          | -5.46                       | 85.06   | -85.03  | 6.81                          |
|               | rural    | 27                 | 4.59                                   | 0.87                                    | 3.72                          | -3.72                       | 81.19   | -81.03  | 4.61                          |
|               | downwind | 11                 | 4.92                                   | 1.09                                    | 3.83                          | -3.83                       | 77.87   | -77.87  | 5.11                          |
|               | urban    | 71                 | 7.36                                   | 0.98                                    | 6.38                          | -6.38                       | 86.72   | -86.72  | 7.69                          |

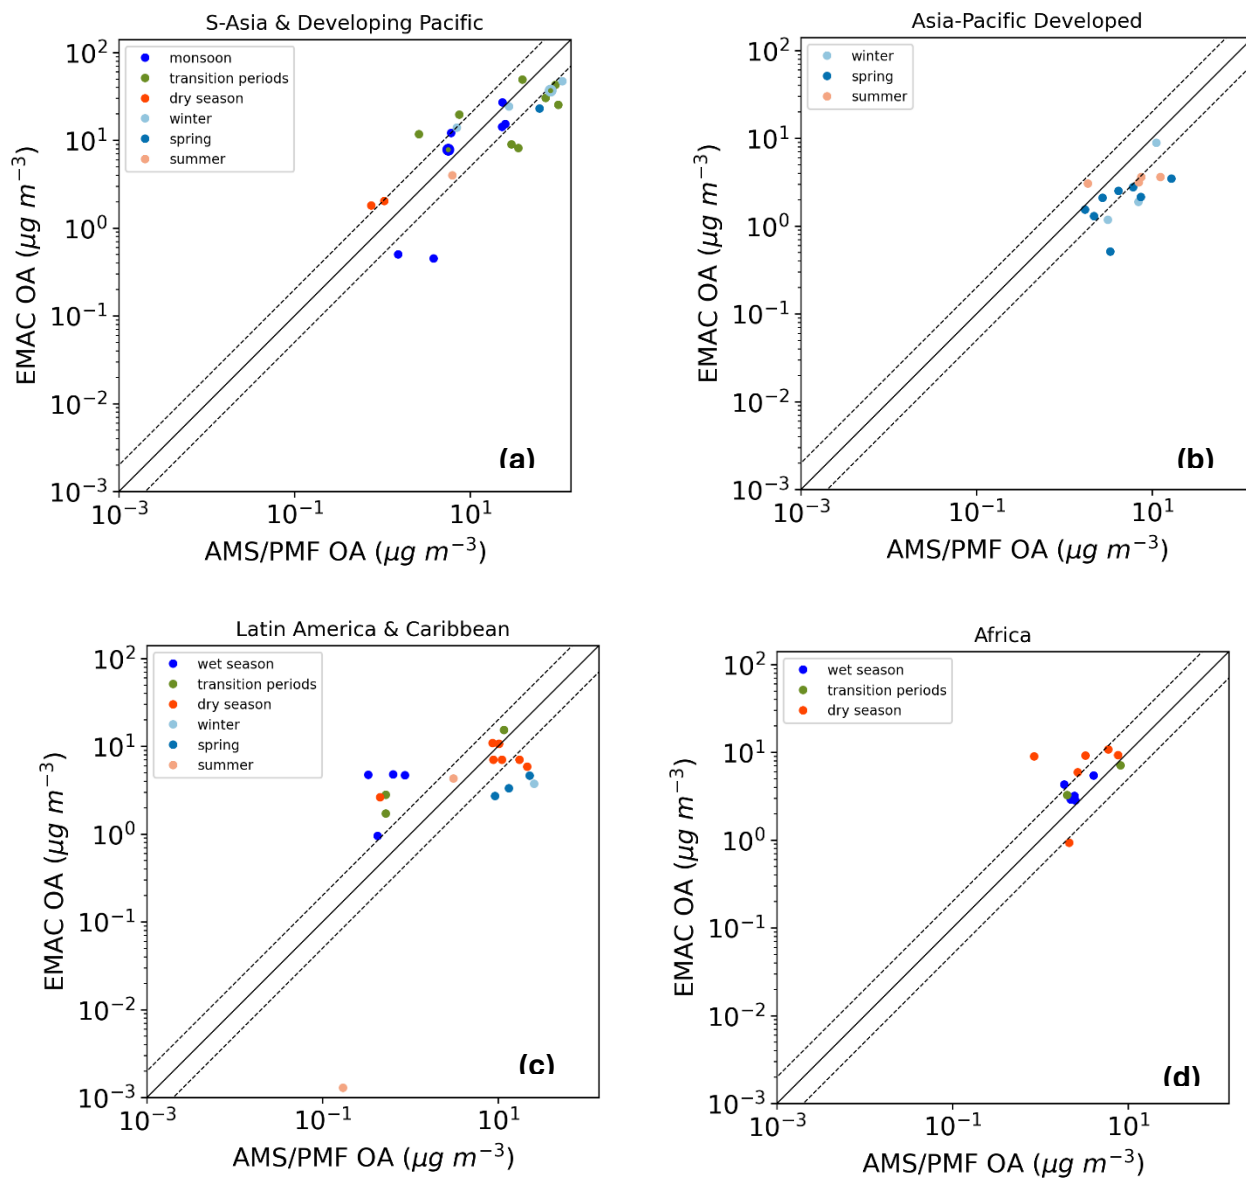

**Figure S1:** Scatter plots comparing EMAC simulated  $\text{PM}_1$  OA concentrations ( $\mu\text{g m}^{-3}$ ) with AMS/ACSM observations over (a) South Asia and Developing Pacific, (b) Asia-Pacific Developed, (c) Latin America and the Caribbean, and (d) Africa regions. Each point represents the mean OA concentration of an individual dataset and is colored by season of the field campaign. Solid and dashed lines indicate the 1:1, 2:1, and 1:2 relationships.
